# Supplementary material
Source: Research Square preprint supplement (doi:10.21203/rs.3.rs-9064564/v1)
Supplement: Supplementary file 1 [file d58094982844735bc1f22e45.docx]

**Questionnaire A**

Questionnaire for Gathering Information on AI Implementation in Supply Chains

Introduction: This questionnaire is designed to gather insights into the current state of Artificial Intelligence (AI) implementation in supply chains. The questions aim to assess the impact of AI on operational efficiency, productivity, challenges faced during integration, and future outlook. Your responses will contribute to a study on the effectiveness of AI in improving supply chain processes and the barriers companies face in adopting AI technologies.

**Section 1: General Information (Expanded)**

**1 Company Name:** *(Optional, can remain anonymous if preferred)*

**2. Industry:**

- - Retail
  - Manufacturing
  - Logistics
  - Healthcare
  - Automotive
  - Agriculture
  - Food and Beverage
  - Other (Please specify) ___________

**3. Company Size:**

- - Small (less than 50 employees)
  - Medium (50-250 employees)
  - Large (250+ employees)

**4. Geographical Reach:**

- - Local (serving only a specific city/region)
  - National (serving across the country)
  - International (serving multiple countries or regions)

**5. Annual Revenue Range:**

- - Less than $1 million
  - $1 million – $10 million
  - $10 million – $50 million
  - $50 million – $100 million
  - More than $100 million

**6. Total Number of Supply Chain Employees:**

- - Less than 10
  - 10-50
  - 50-100
  - More than 100

**7. How long has your company been operating in its current market?**

- - Less than 1 year
  - 1-5 years
  - 5-10 years
  - More than 10 years

**8. What percentage of your company's overall budget is allocated to supply chain operations?**

- - Less than 10%
  - 10% - 25%
  - 25% - 50%
  - More than 50%

**9. What is the primary business model of your company?**

- - B2B (Business-to-Business)
  - B2C (Business-to-Consumer)
  - Hybrid (Both B2B and B2C)

**10. What are the primary supply chain functions within your organization? (Select all that apply)**

- - Procurement
  - Production/Manufacturing
  - Inventory Management
  - Distribution and Logistics
  - Sales and Order Fulfillment
  - Supplier Relationship Management
  - Demand Planning and Forecasting
  - Other (Please specify) ___________

**11. Has your company previously implemented or explored AI in any other business areas (besides supply chain)?**

- - Yes
  - No
  - Not sure

**12. Does your company have a dedicated team or department for AI implementation?**

- - Yes, a dedicated AI team
  - AI is handled by existing supply chain or IT teams
  - No dedicated team, but we outsource AI implementation
  - No AI team, AI is not yet part of our strategy

**Section 2: AI Implementation and Usage**

**13. What AI technologies have you implemented in your supply chain?**

- - Machine Learning
  - Predictive Analytics
  - Robotics Process Automation (RPA)
  - Internet of Things (IoT)
  - Artificial Neural Networks
  - Other (Please specify) ___________

**14. In which areas of your supply chain have you integrated AI? (Select all that apply)**

- - Demand Forecasting
  - Inventory Management
  - Logistics and Delivery Optimization
  - Production Scheduling
  - Predictive Maintenance
  - Customer Service (e.g., Chatbots)
  - Other (Please specify) ___________

**Variable 1: AI Technologies Implemented**

These items will assess the types of AI technologies the company has implemented and the extent of usage in the supply chain. **1** - Strongly Disagree, **2** – Disagree, **3** – Neutral, **4** – Agree, **5** - Strongly Agree

| SN | Items | **5** | **4** | **3** | **2** | **1** |
| --- | --- | --- | --- | --- | --- | --- |
| 16 | We have implemented machine learning models in our supply chain operations. |  |  |  |  |  |
| 17 | We use predictive analytics to improve demand forecasting and inventory management |  |  |  |  |  |
| 18 | Our company has integrated Robotics Process Automation (RPA) for process optimization |  |  |  |  |  |
| 19 | We utilize Internet of Things (IoT) devices for real-time supply chain monitoring. |  |  |  |  |  |
| 20 | Artificial Neural Networks are deployed in our supply chain decision-making processes |  |  |  |  |  |
| 21 | Our company uses AI-driven tools for route optimization in logistics and delivery | ` |  |  |  |  |
| 22 | We have incorporated chatbots or AI-based virtual assistants for customer service |  |  |  |  |  |

**Variable 2: AI Integration in Supply Chain Areas**

*This variable assesses the extent to which AI has been integrated across various areas of the supply chain.* ***1*** *- Not at all Integrated,* ***2*** *- Slightly Integrated,* ***3*** *- Moderately Integrated,* ***4*** *- Largely Integrated,* ***5*** *- Fully Integrated*

| SN | Items | ***5*** | ***4*** | ***3*** | ***2*** | ***1*** |
| --- | --- | --- | --- | --- | --- | --- |
| 23 | AI has been integrated into our demand forecasting processes. |  |  |  |  |  |
| 24 | AI is actively used in inventory management and optimization in our supply chain |  |  |  |  |  |
| 25 | We use AI for optimizing logistics routes and improving transportation efficiency. |  |  |  |  |  |
| 26 | Our production scheduling processes are improved through AI-based solutions |  |  |  |  |  |
| 27 | Predictive maintenance of machinery and equipment in our supply chain is powered by AI |  |  |  |  |  |
| 28 | AI is used in our supplier relationship management and procurement activities. | ` |  |  |  |  |
| 29 | AI tools are deployed in customer service for order tracking and queries |  |  |  |  |  |

**Variable 3: Measurable Improvements from AI Implementation**

*This variable evaluates the measurable improvements experienced by the company due to AI adoption in the supply chain.* **1** - Strongly Disagree, **2** – Disagree, **3** – Neutral, **4** – Agree, **5** - Strongly Agree

| SN | Items | ***5*** | ***4*** | ***3*** | ***2*** | ***1*** |
| --- | --- | --- | --- | --- | --- | --- |
| 30 | AI has helped reduce operational costs in our supply chain. |  |  |  |  |  |
| 31 | The speed of order fulfillment has increased due to AI integration. |  |  |  |  |  |
| 32 | Inventory accuracy has improved as a result of AI-based inventory management tools. |  |  |  |  |  |
| 33 | AI has contributed to better demand forecasting and fewer stockouts. |  |  |  |  |  |
| 34 | Customer satisfaction has improved as a result of AI-enhanced customer service |  |  |  |  |  |
| 35 | AI has led to improved decision-making in our supply chain operations. | ` |  |  |  |  |
| 36 | The overall efficiency of our supply chain has significantly improved due to AI. |  |  |  |  |  |

**Variable 4: Challenges Faced During AI Implementation**

This variable assesses the obstacles the company faced while integrating AI into their supply chain processes. **1** - Strongly Disagree, **2** – Disagree, **3** – Neutral, **4** – Agree, **5** - Strongly Agree

| SN | Items | ***5*** | ***4*** | ***3*** | ***2*** | ***1*** |
| --- | --- | --- | --- | --- | --- | --- |
| 37 | We encountered significant technological limitations when implementing AI in our supply chain |  |  |  |  |  |
| 38 | There was a lack of skilled personnel to manage and deploy AI technologies. |  |  |  |  |  |
| 39 | Our company struggled with poor data quality, which affected AI effectiveness. |  |  |  |  |  |
| 40 | The initial costs of implementing AI were higher than expected. |  |  |  |  |  |
| 41 | There was resistance from employees due to concerns about job automation |  |  |  |  |  |
| 42 | Integrating AI with existing legacy systems posed a significant challenge. | ` |  |  |  |  |
| 43 | We faced difficulties in securing management buy-in for AI adoption. |  |  |  |  |  |

**Variable 5: Future Expectations and Outlook**

*This variable assesses the company’s outlook on AI in the future and what benefits they hope to gain.* ***1*** *- Strongly Disagree,* ***2*** *– Disagree,* ***3*** *– Neutral,* ***4*** *– Agree,* ***5*** *- Strongly Agree*

| SN | Items | ***5*** | ***4*** | ***3*** | ***2*** | ***1*** |
| --- | --- | --- | --- | --- | --- | --- |
| 44 | We expect AI to play a larger role in our supply chain operations in the next 5 years. |  |  |  |  |  |
| 45 | AI will enable our supply chain to achieve real-time data insights in the future |  |  |  |  |  |
| 46 | AI will lead to significant improvements in supply chain collaboration with stakeholdres |  |  |  |  |  |
| 47 | We foresee AI optimizing end-to-end supply chain processes more effectively in the future |  |  |  |  |  |
| 48 | We expect AI to enhance the customer experience and delivery times significantly in future. |  |  |  |  |  |
| 49 | AI will help us in predictive maintenance, reducing downtime and increasing longevity. | ` |  |  |  |  |
| 50 | AI is expected to offer more comprehensive solutions that integrate various supply SC functions. |  |  |  |  |  |

**Variable 6: Long-Term Impact of AI on Supply Chain Jobs**

This variable explores the perceived impact of AI on workforce dynamics and supply chain jobs. ***1*** *- Strongly Disagree,* ***2*** *– Disagree,* ***3*** *– Neutral,* ***4*** *– Agree,* ***5*** *- Strongly Agree*

| SN | Items | ***5*** | ***4*** | ***3*** | ***2*** | ***1*** |
| --- | --- | --- | --- | --- | --- | --- |
| 51 | AI adoption will lead to the creation of new roles and job opportunities in the supply chain |  |  |  |  |  |
| 52 | AI will result in job displacement in certain supply chain functions. |  |  |  |  |  |
| 53 | AI will enhance human roles by automating repetitive tasks, allowing them to focus on more strategic work. |  |  |  |  |  |
| 54 | Our workforce is ready to adapt to the changes AI will bring in the supply chain |  |  |  |  |  |
| 55 | AI will increase demand for highly skilled professionals in supply chain management. |  |  |  |  |  |
| 56 | AI will automate decision-making, reducing the need for human intervention in certain tasks. | ` |  |  |  |  |
| 56 | The adoption of AI will require retraining of employees to work with new technologies in SC |  |  |  |  |  |
